# Supplementary material for: Structural diversity and modification in Ni(ii) coordination polymers: a peculiar phenomenon of reversible structural transformation between a 1D ladder and 2D layer
Source: Royal Society of Chemistry journal article supplement (doi:10.1039/d0ce01170c), 2020-01-01

**Electronic supplementary Information (ESI)**

**Structural Diversity and Modification in Ni(II) Coordination  
Polymers: Peculiar Phenomenon of Reversible Structural  
Transformation between 1D Ladder and 2D Layer**

Chia-Jou Chen,<sup>a</sup> Wei-Te Lee,<sup>a</sup> Ji-Hong Hu,<sup>a</sup>  
Pradhumna Mahat Chhetri\*<sup>b</sup> and Jhy-Der Chen\*<sup>a</sup>

*<sup>a</sup>Department of Chemistry, Chung Yuan Christian University, Chung-Li,  
Taiwan, R.O.C.*

*<sup>b</sup>Department of Chemistry, Amrit Campus, Tribhuvan University,  
Kathmandu, Nepal*

**Figure S1.** The PXRD patterns of complex **1**.

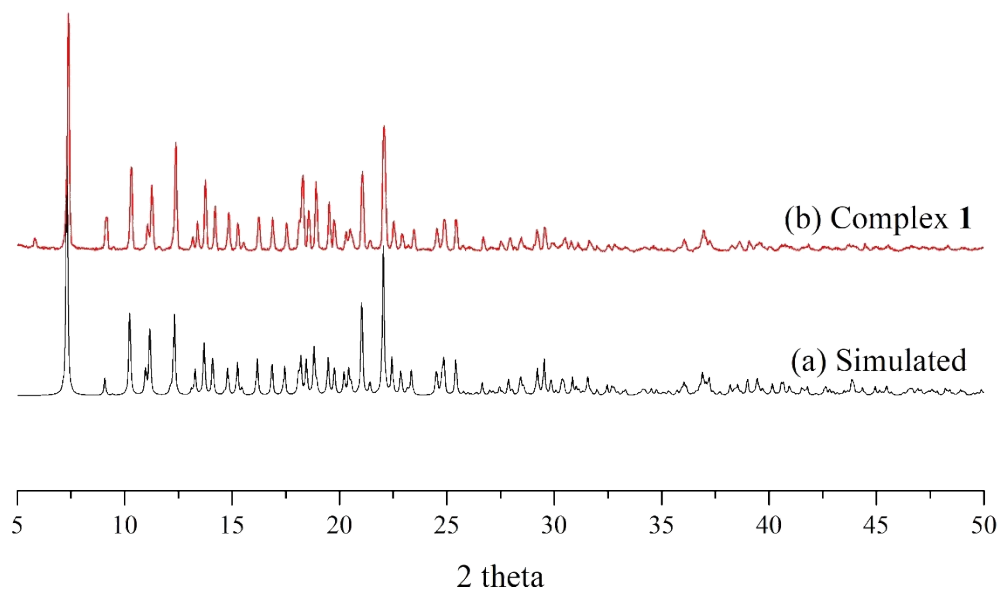

**Figure S2.** The PXRD patterns of complex **2**.

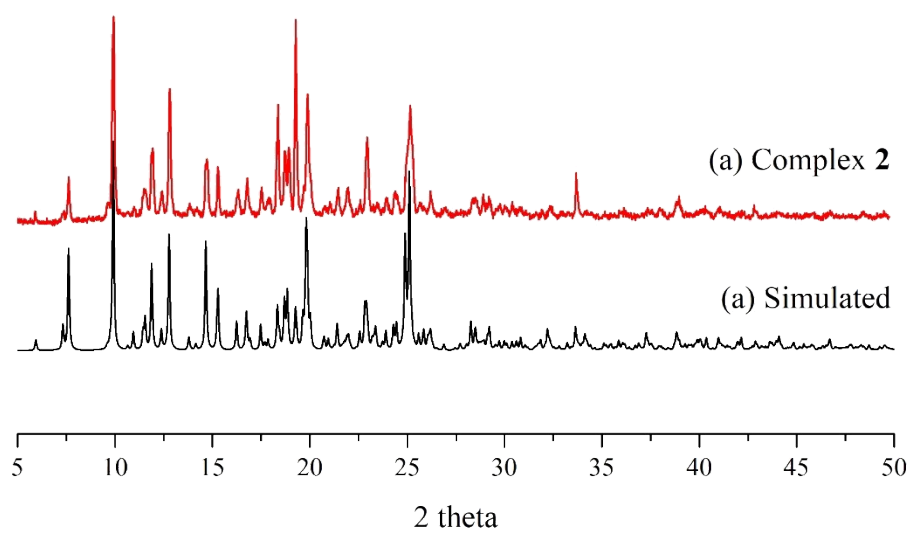

**Figure S3.** The PXRD patterns of complex **3**.

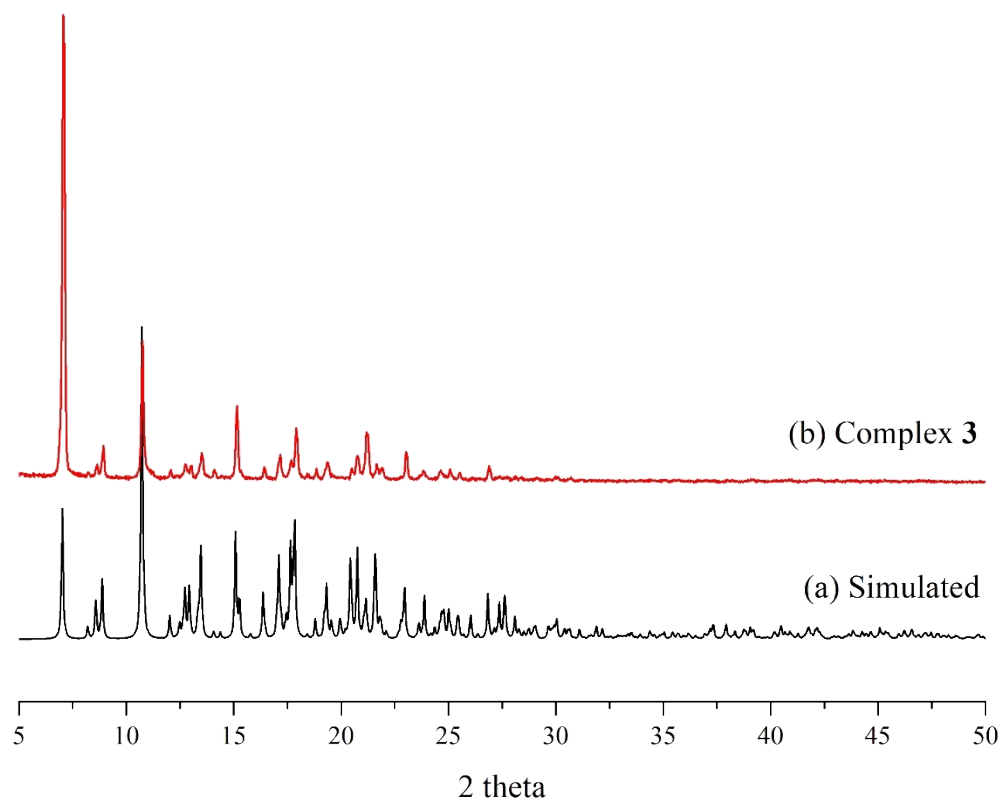

**Figure S4.** The PXRD patterns of complex 4.

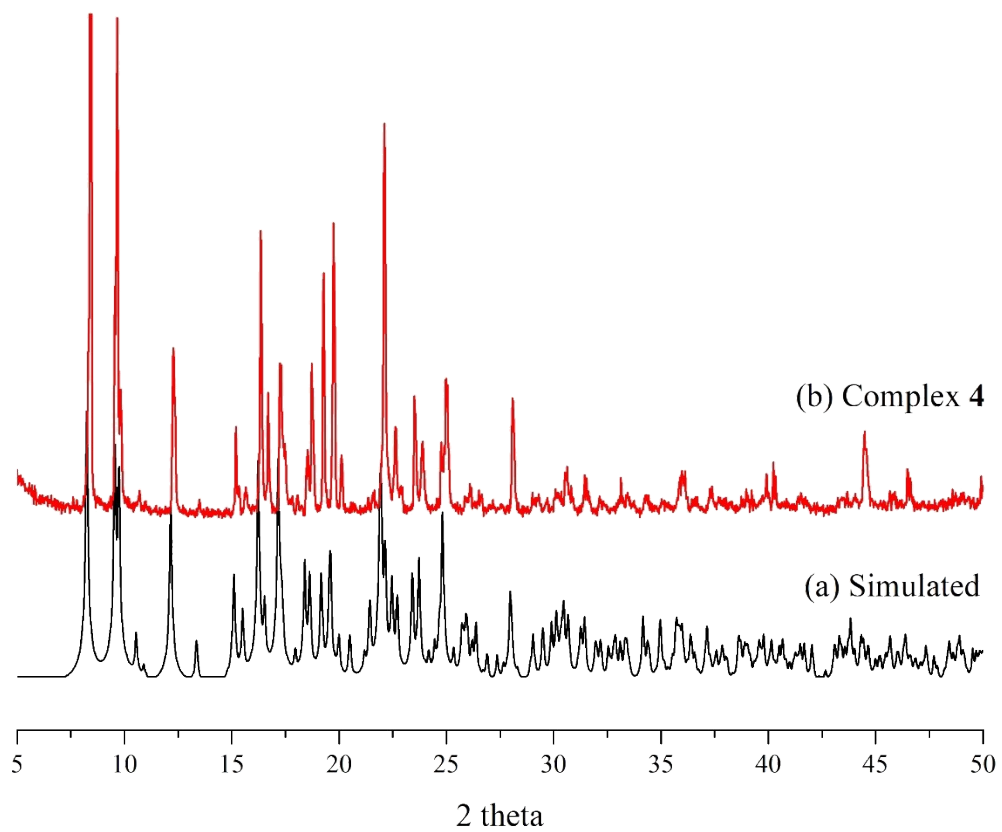

**Figure S5.** The PXRD patterns of complex **5**.

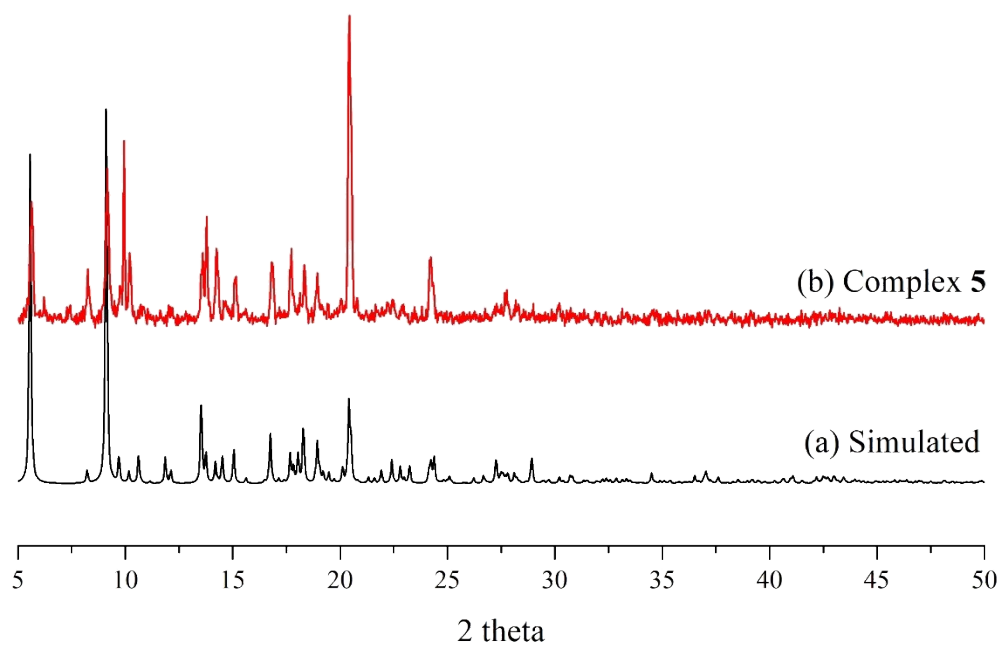

**Figure S6.** TGA curve of complex **1**.

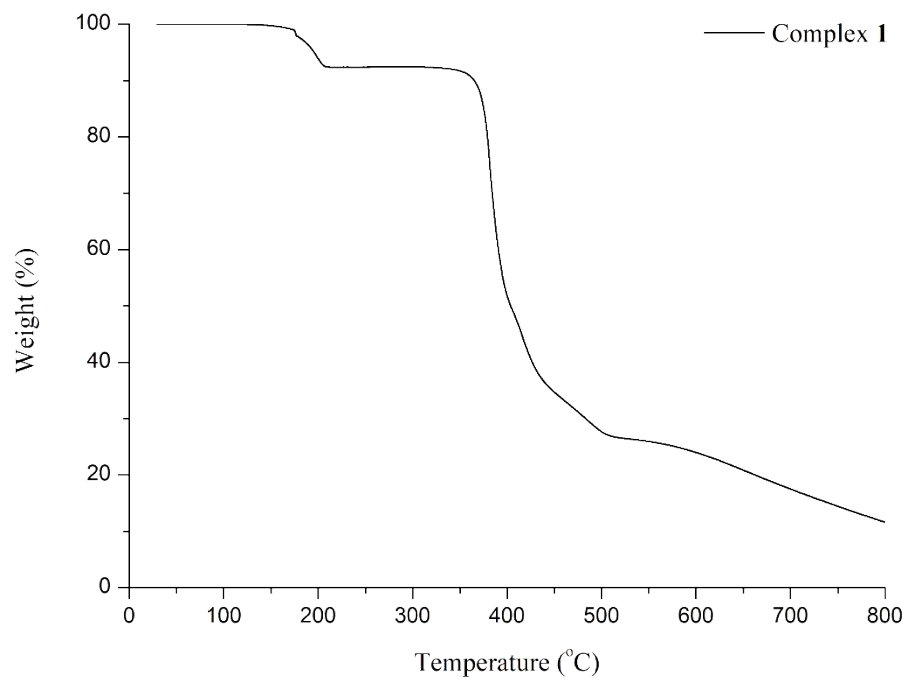

**Figure S7.** TGA curve of complex **2**.

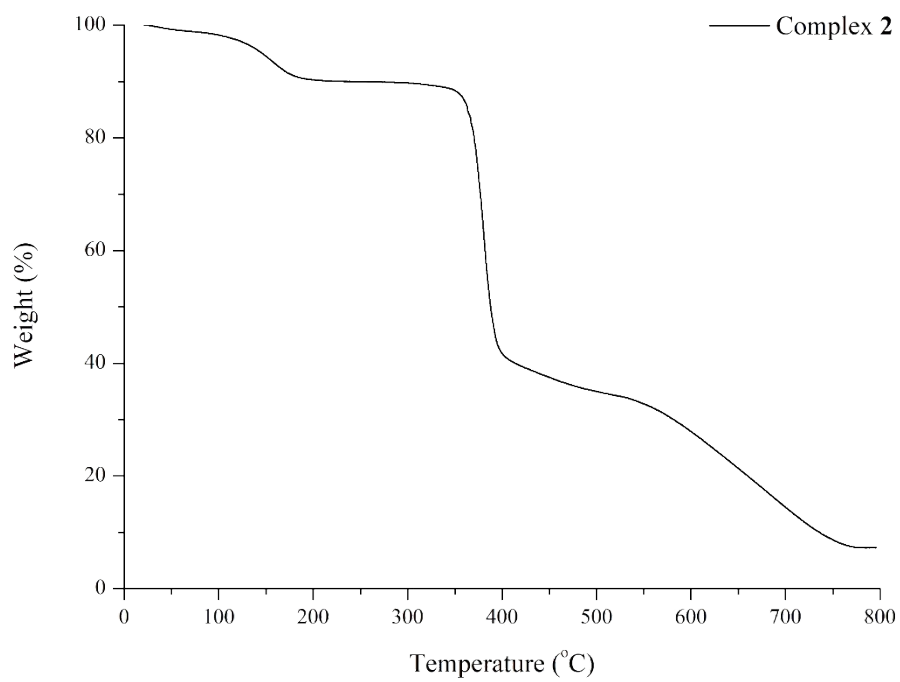



**Figure S8.** TGA curve of complex **3**.

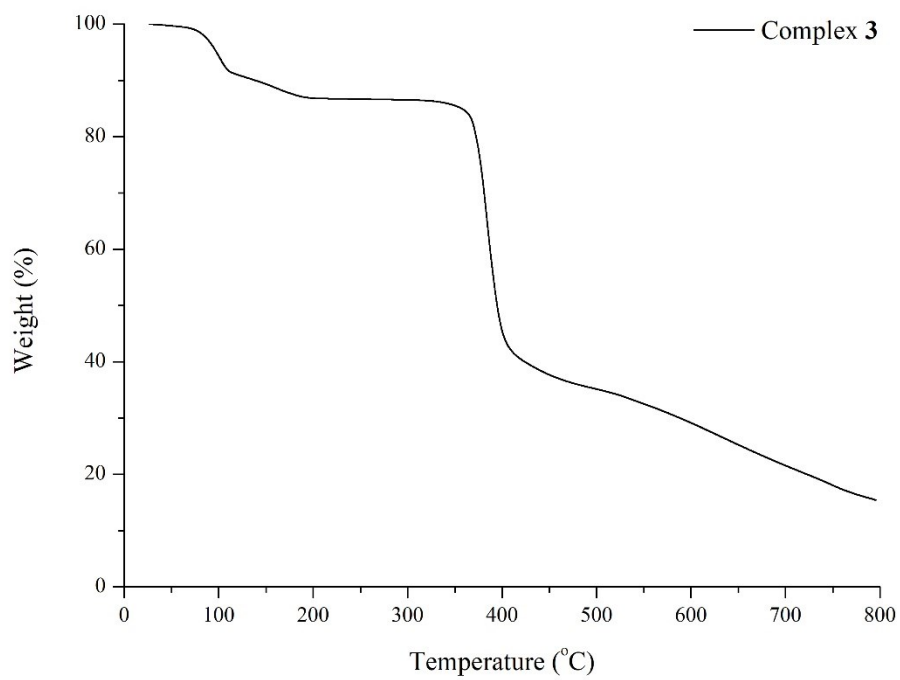

**Figure S9.** TGA curve of complex 4.

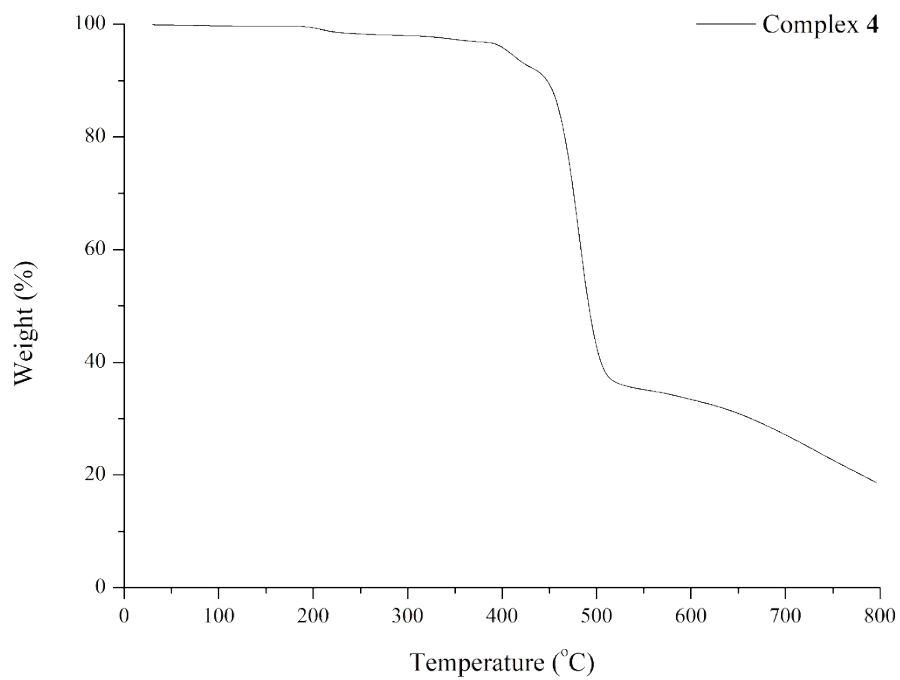

**Figure S10.** TGA curve of complex **5**.

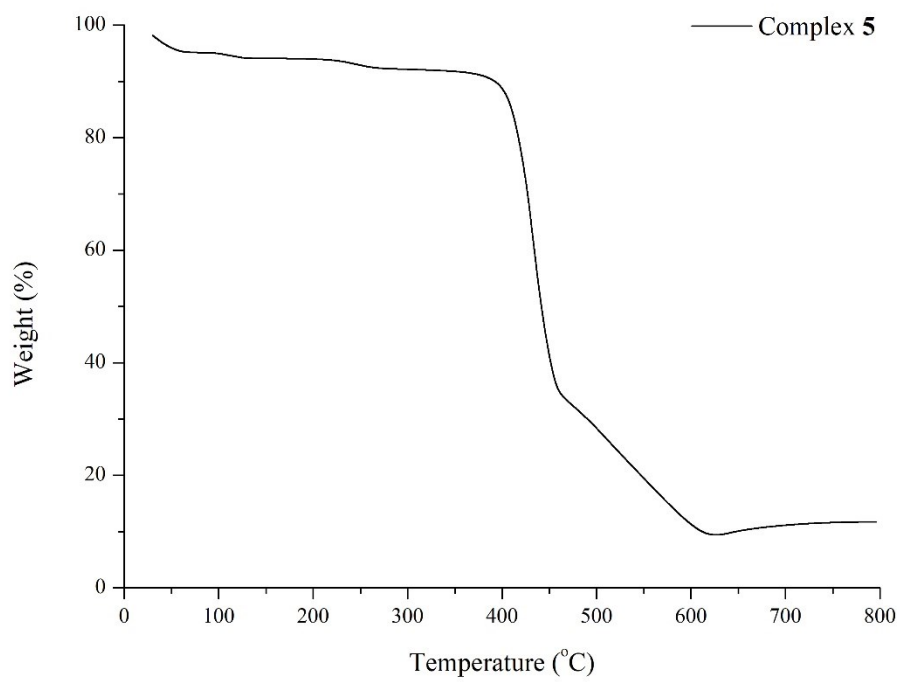

**Figure S11.** The IR spectra of complex **2** after hydrothermal reaction.

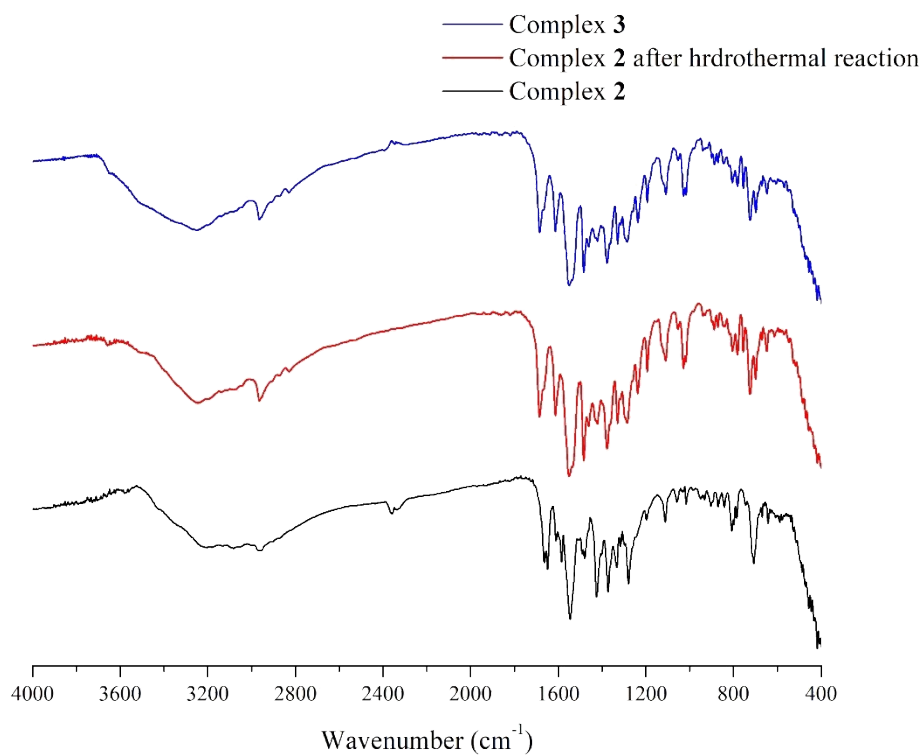

**Figure S12.** The IR spectra of complex 3 after hydrothermal reaction.

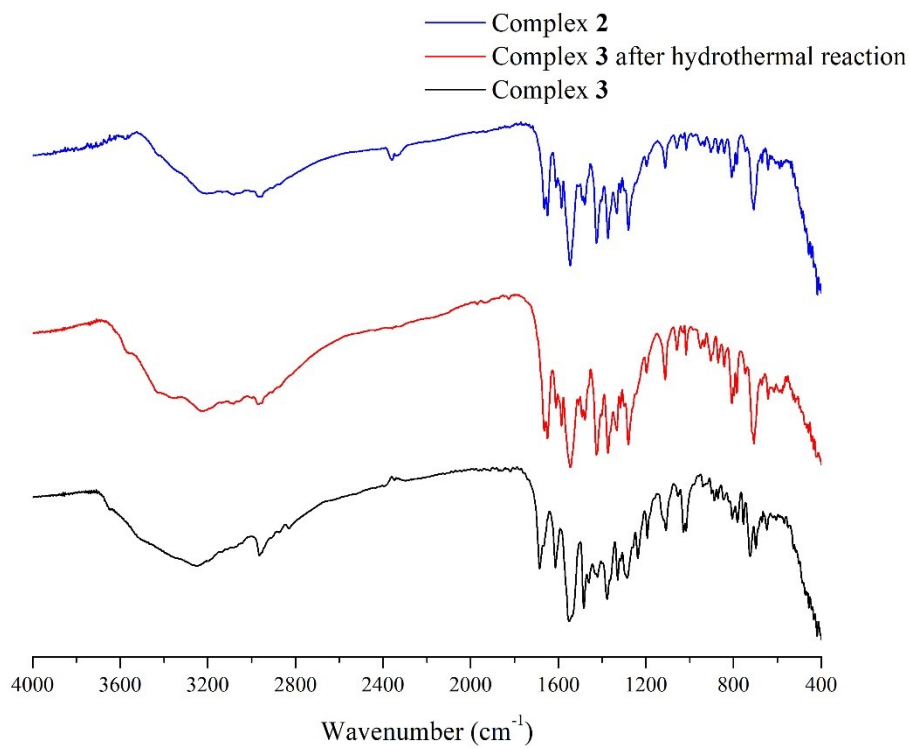

**Figure S13.** The photoluminescence spectra of **L**.

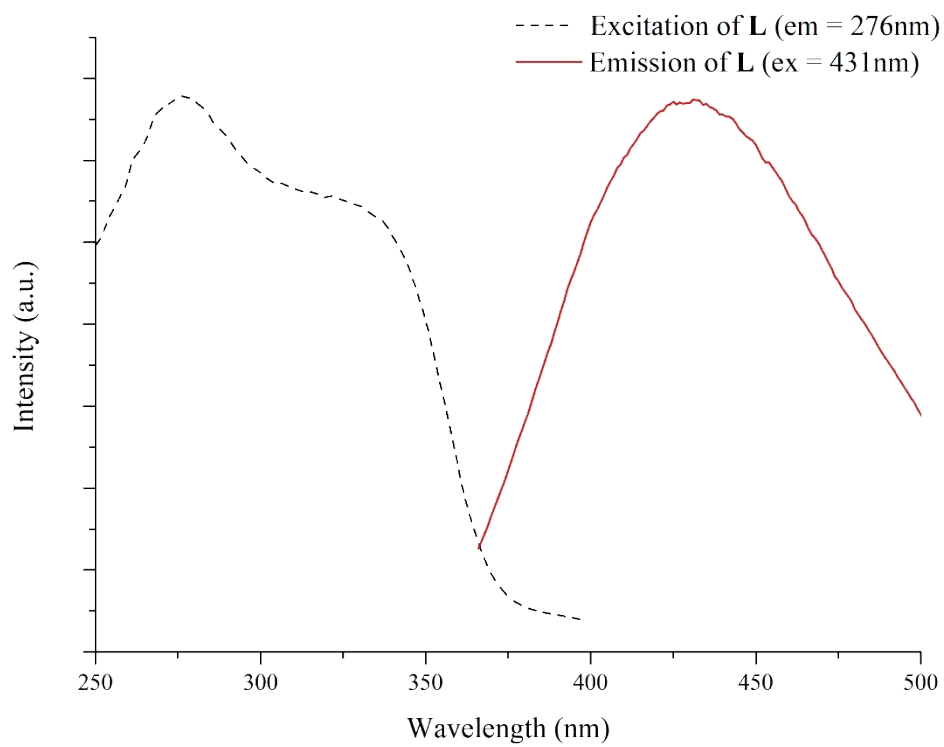

**Figure S14.** The photoluminescence spectra of 5-tert-H<sub>2</sub>IPA.

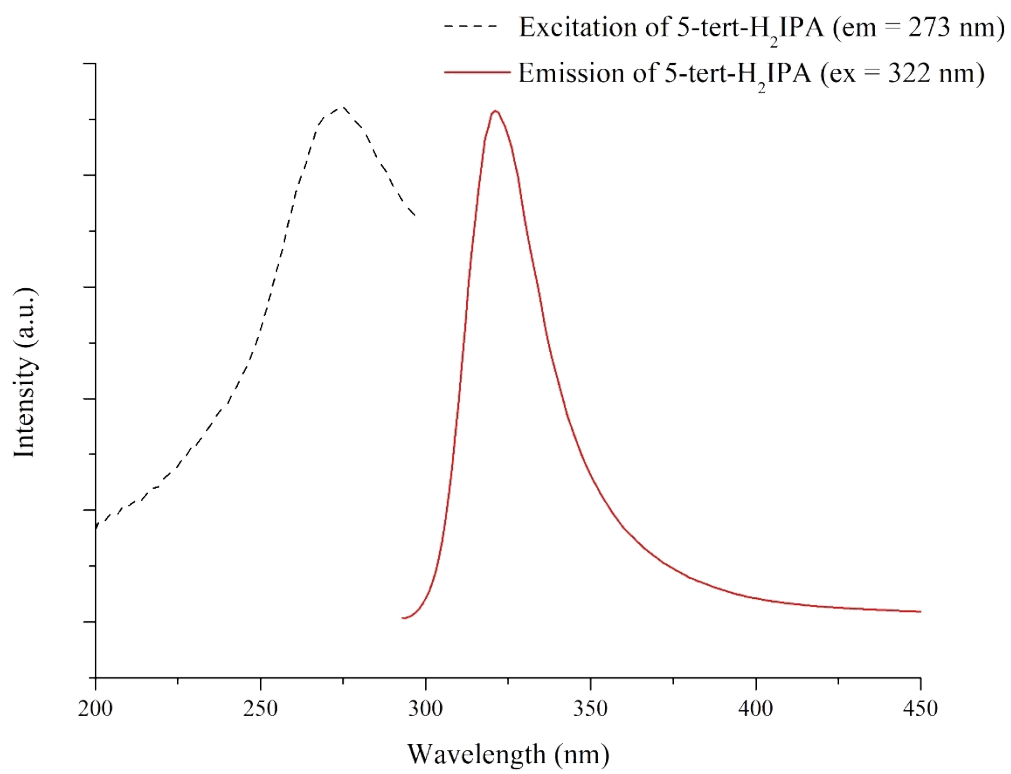

**Figure S15.** The photoluminescence spectra of complex **1**.

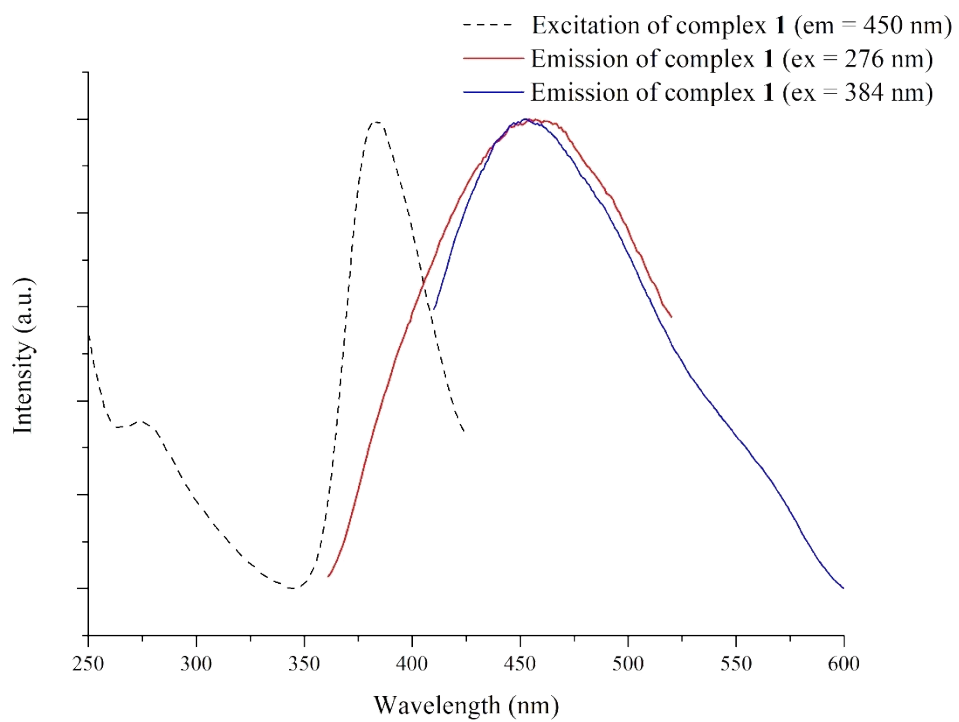



**Figure S16.** The photoluminescence spectra of complex **4**.

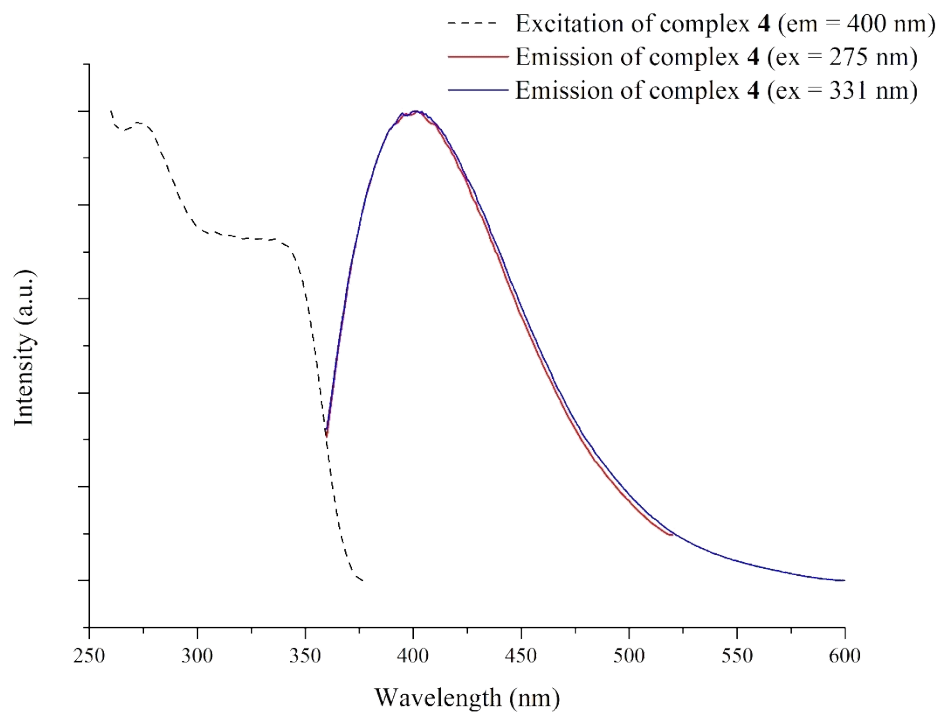

Supplement: d0ce01170c1.pdf [file d0ce01170c1.pdf]
